# Supplementary material for: Multi-omics analysis reveals gut microbiota remodeling and lipid metabolism regulation during the treatment of nonalcoholic fatty liver disease with Yindan Pinggan capsule
Source: Research Square preprint supplement (doi:10.21203/rs.3.rs-7631502/v1), 2025-10-15
Supplement: Supplementary file 1 [file 45aaf4799166793c0f307db0.docx]

Table S7 Primers used in this study

| Gene primer name | Primer sequence (5'-3') |
| --- | --- |
| Gapdh_F | AGGTCGGTGTGAACGGATTTG |
| Gapdh_R | TGTAGACCATGTAGTTGAG GTCA |
| Cyp39a1_F | TGCACTGCATGAGCGACTG |
| Cyp39a1_R | GGTATTGAGTGTGGCTGGATAAA |
| Hsd3b7_F | GGGAGCTGCGTGTCTTTGA |
| Hsd3b7_R | GTGGATGGTCTTTGGACTGGC |
| Cyp27a1_F | GCACAGGAGAGTACGGAGG |
| Cyp27a1_R | CGGGCAAGTGCAGCACATA |
| Ppard_F | TCCATCGTCAACAAAGACGGG |
| Ppard_R | ACTTGGGCTCAATGATGTCAC |
| Pparg_F | TCGCTGATGCACTGCCTATG |
| Pparg_R | GAGAGGTCCACAGAGCTGATT |
| Cyp7a1_F | GGGATTGCTGTGGTAGTGAGC |
| Cyp7a1_R | GGTATGGAATCAACCCGTTGTC |
| Hmgcr_F | CTGGAATTATGAGTGCCCCAAA |
| Hmgcr _R | ACGACTGTACTGAAGACAAAGC |
| LXRα/Nr1h3_F | CTCAATGCCTGATGTTTCTCCT |
| LXRα/Nr1h3 _R | TCCAACCCTATCCCTAAAGCAA |
| Abcg5_F | AGGGCCTCACATCAACAGAG |
| Abcg5 _R | GCTGACGCTGTAGGACACAT |
| Abcg8_F | CTGTGGAATGGGACTGTACTTC |
| Abcg8 _R | GTTGGACTGACCACTGTAGGT |
| Nfkb1_F | AGGCTTCTGGGCCTTATGTG |
| Nfkb1 _R | TGCTTCTCTCGCCAGGAATAC |
| Fmo1_F | ACAGCCGACAGTATAAACATCCA |
| Fmo1 _R | CCCTCCAGTAGTGCTGAGGAA |
| Scd1_F | TTCTTGCGATACACTCTGGTGC |
| Scd1 _R | CGGGATTGAATGTTCTTGTCGT |
| Gadl1_F | GAACCTTGTTCAATTTCATCCGC |
| Gadl1 _R | GGTCCATTAAGTACAACCCCATC |
| Cyp8b1_F | CCTCTGGACAAGGGTTTTGTG |
| Cyp8b1 _R | GCACCGTGAAGACATCCCC |
| Srebp2_F | GCAGCAACGGGACCATTCT |
| Srebp2 _R | CCCCATGACTAAGTCCTTCAACT |
| Asl1_F | TGCCAGAGCTGATTGACATTC |
| Asl1 _R | GGCATACCAGAAGGTGGTGAG |
| TNF-α_F | CGCTGAGGTCAATCTGC |
| TNF-α _R | GGCTGGGTAGAGAATGGA |
| IL-6_F | ACAGAAGGAGTGGCTAAGGA |
| IL-6 _R | AGGCATAACGCACTAGGTTT |
| IL-1β_F | AGTTGACGGACCCCAAA |
| IL-1β _R | TCTTGTTGATGTGCTGCTG |
